# Supplementary material for: Interplay between halides in the electrolyte and the chemical states of Cu in Cu-based electrodes determines the selectivity of the C2product
Source: Royal Society of Chemistry journal article supplement (doi:10.1039/c9se01318k), 2020-01-01
Supplement: c9se01318k1.pdf [file c9se01318k1.pdf]

Electronic Supplementary information for:

**Interplay between Halides in Electrolyte and Chemical States of  
Cu in Cu-based Electrode Determines Selectivity of the C<sub>2</sub>  
Product**

Yang Yang<sup>a</sup>, Kejian Li<sup>a</sup>, Saira Ajmal<sup>a</sup>, Yiqing Feng<sup>a</sup>, Aziz-Ur-Rahim Bacha<sup>a</sup>, Iqra  
Nabi<sup>a</sup>, Liwu Zhang<sup>a,b\*</sup>

<sup>a</sup>*Shanghai Key Laboratory of Atmospheric Particle Pollution and Prevention,  
Department of Environmental Science and Engineering, Fudan University. Shanghai,  
200433, P. R. China.*

<sup>b</sup>*Shanghai Institute of Pollution Control and Ecological Security, Shanghai, 200092,  
Peoples' Republic of China*

E-mail: [zhanglw@fudan.edu.cn](mailto:zhanglw@fudan.edu.cn)

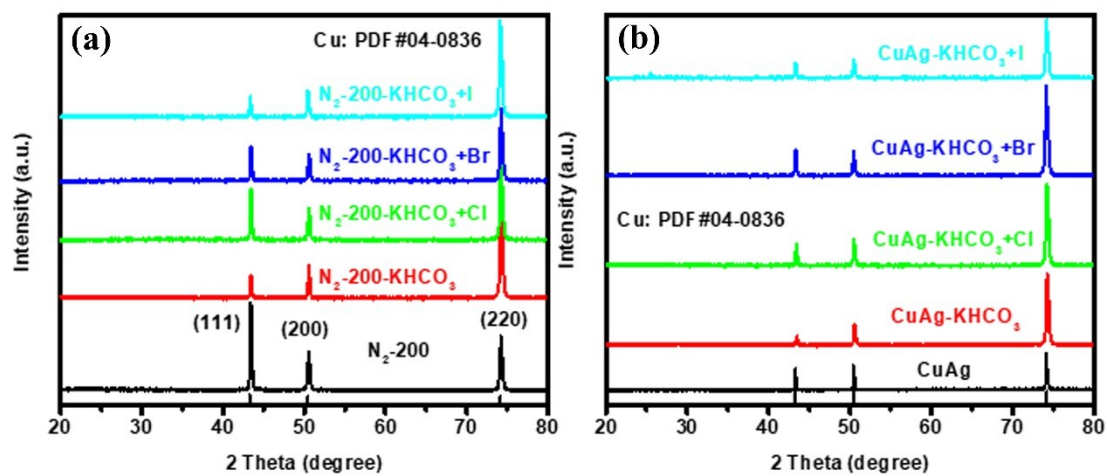

**Fig. S1** The XRD spectra of (a) N<sub>2</sub>-200 and (b) CuAg alloy before and after reaction in 0.1 M KHCO<sub>3</sub>, 0.1 M KHCO<sub>3</sub> + 0.1 M KCl, 0.1 M KHCO<sub>3</sub> + 0.1 M KBr and 0.1 M KHCO<sub>3</sub> + 0.1 M KI electrolyte at -1.7 V versus (vs.) RHE.

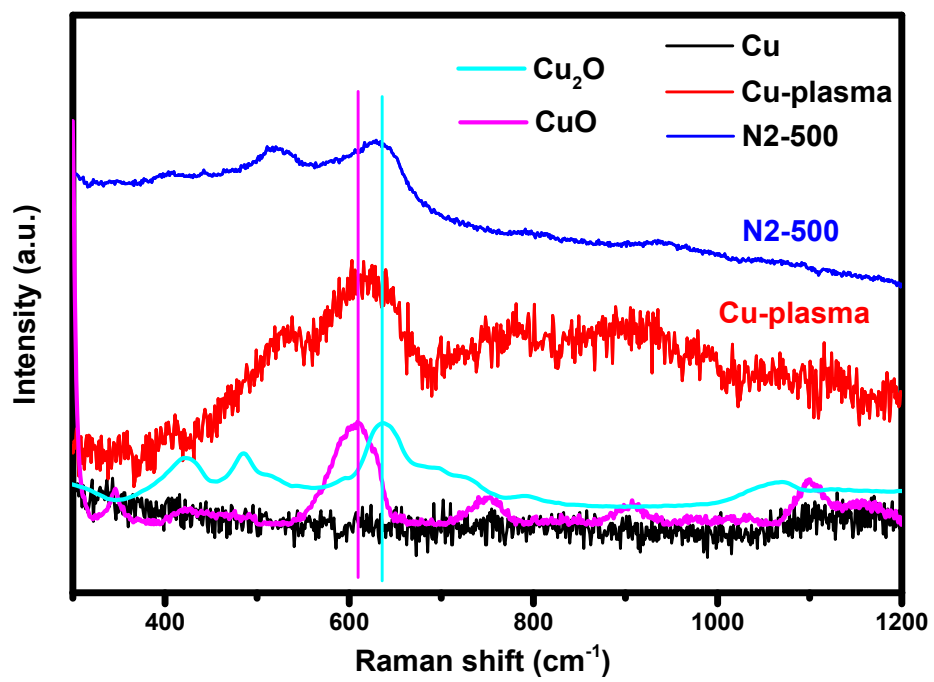

**Fig. S2** Raman spectra of Cu, N2-500 and Cu-plasma.

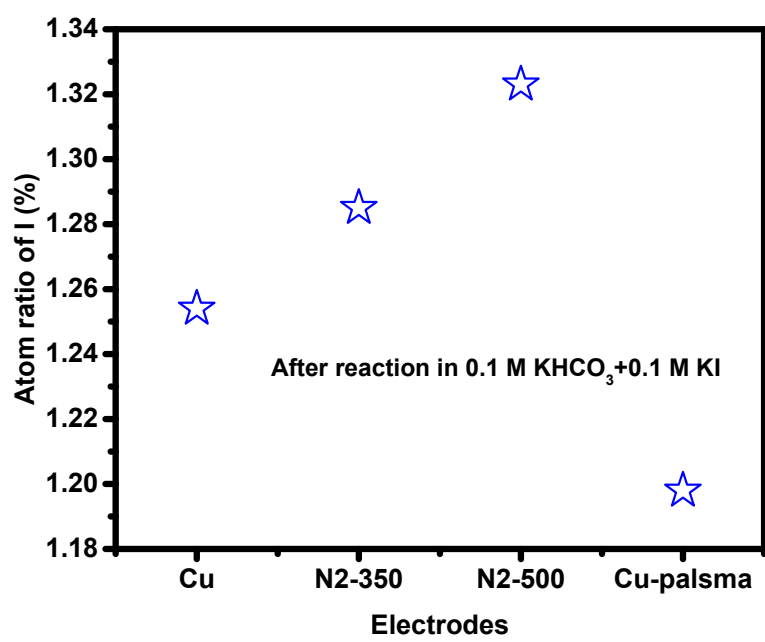

**Fig. S3** Atomic percentage of I element on electrodes surface detected by XPS.

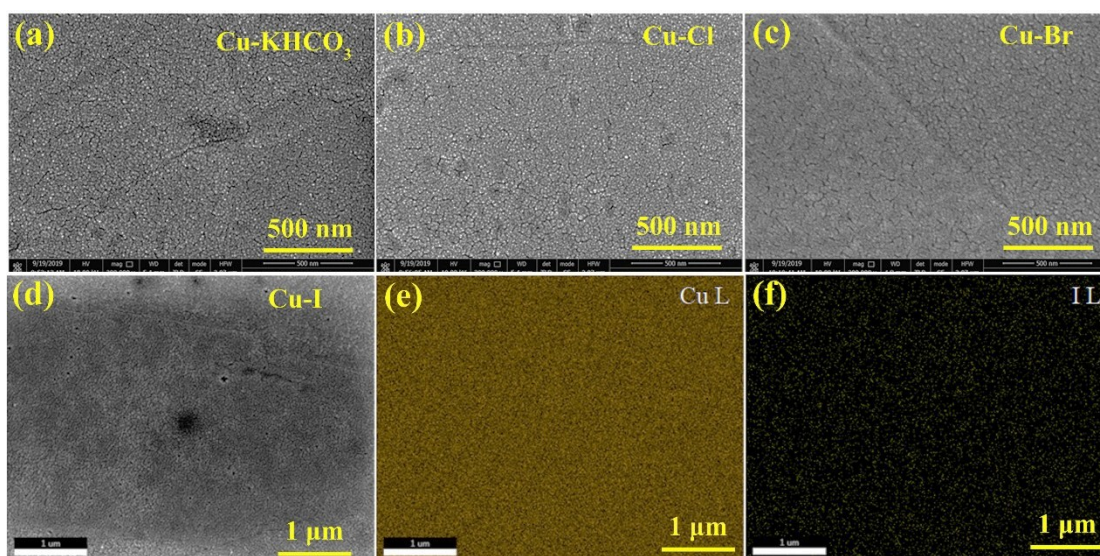

**Fig. S4** SEM images of Cu electrode after reaction in (a) 0.1 M KHCO<sub>3</sub>, (b) 0.1 M KHCO<sub>3</sub> + 0.1 M KCl, (c) 0.1 M KHCO<sub>3</sub> + 0.1 M KI at -1.7 V vs. RHE. EDX mapping of (e) Cu and (f) I element distribution in (d).

Table S1. Elemental composition (atomic and weight percentage) as determined by EDX of Cu electrode after reaction in 0.1 M KHCO<sub>3</sub> + 0.1 M KI electrolyte at -1.7 V vs. RHE.

| Element | Weight (%) | Atomic (%) |
|---------|------------|------------|
| Cu L    | 98.3       | 98.9       |
| I L     | 0.02       | 0.018      |
| O K     | 1.67       | 1.1        |

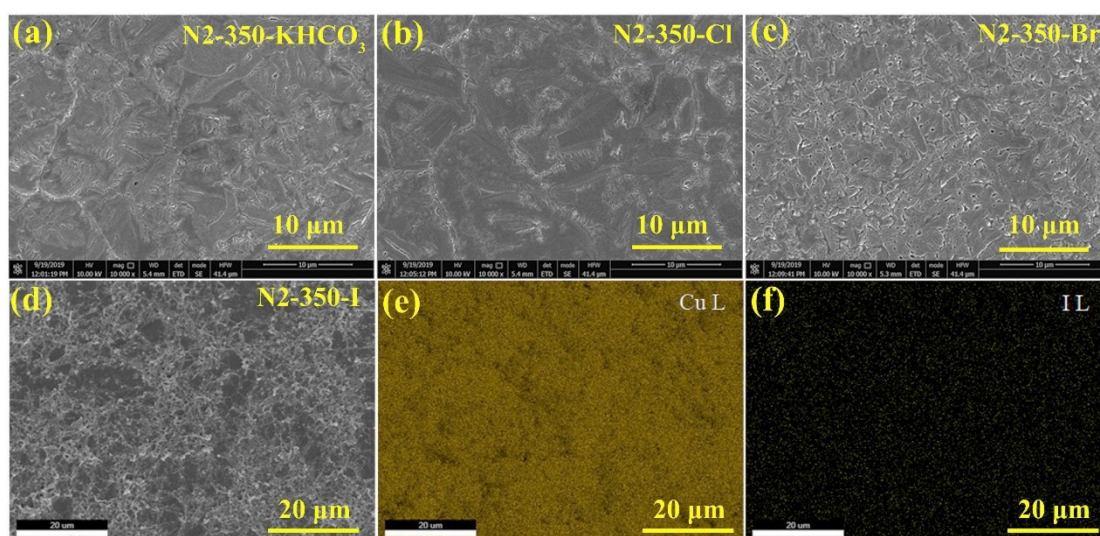

**Fig. S5** SEM images of N2-350 electrode after reaction in (a) 0.1 M  $\text{KHCO}_3$ , (b) 0.1 M  $\text{KHCO}_3 + 0.1 \text{ M KCl}$ , (c) 0.1 M  $\text{KHCO}_3 + 0.1 \text{ M KCl}$ , (d) 0.1 M  $\text{KHCO}_3 + 0.1 \text{ M KI}$ . EDX mapping of (e) Cu and (f) I element distribution in (d) at -1.7 V vs. RHE.

Table S2. Elemental composition (atomic and weight percentage) as determined by EDX of N2-350 electrode after reaction in 0.1 M  $\text{KHCO}_3 + 0.1 \text{ M KI}$  electrolyte at -1.7 V vs. RHE.

| Element | Weight (%) | Atomic (%) |
|---------|------------|------------|
| Cu L    | 96.15      | 89.99      |
| I L     | 1.33       | 0.62       |
| O K     | 2.53       | 9.39       |

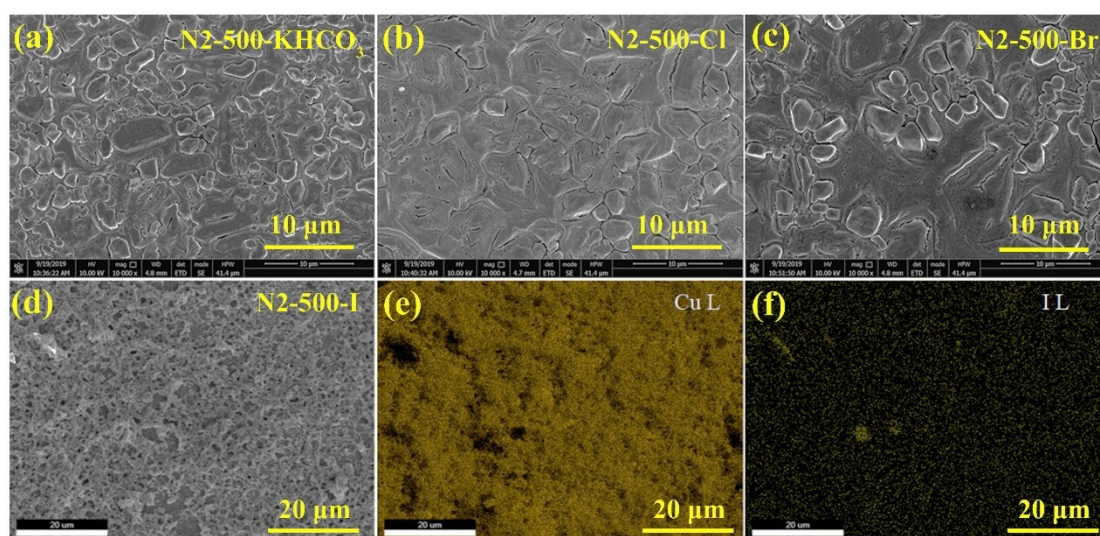

**Fig. S6** SEM images of N2-500 electrode after reaction in (a) 0.1 M KHCO<sub>3</sub>, (b) 0.1 M KHCO<sub>3</sub> + 0.1 M KCl, (c) 0.1 M KHCO<sub>3</sub> + 0.1 M KI, (d) 0.1 M KHCO<sub>3</sub> + 0.1 M KI. EDX mapping of (e) Cu and (f) I element distribution in (d) at -1.7 V vs. RHE.

Table S3. Elemental composition (atomic and weight percentage) as determined by EDX of N2-500 electrode after reaction in 0.1 M KHCO<sub>3</sub> + 0.1 M KI electrolyte at -1.7 V vs. RHE.

| Element | Weight (%) | Atomic (%) |
|---------|------------|------------|
| Cu L    | 87.9       | 71.66      |
| I L     | 3.8        | 1.55       |
| O K     | 8.3        | 26.78      |

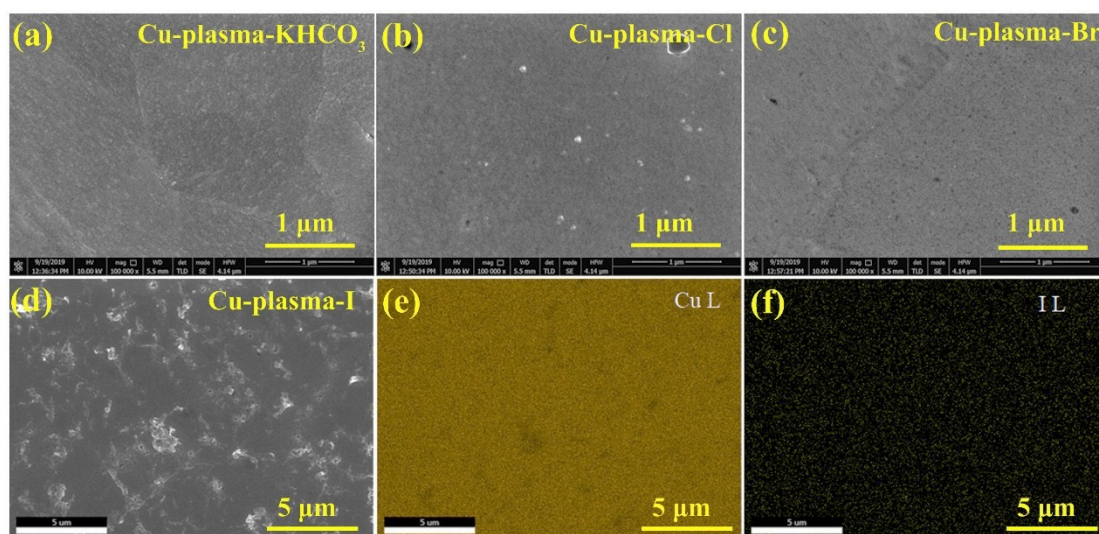

**Fig.S7** SEM images of Cu-plasma electrode after reaction in (a) 0.1 M KHCO<sub>3</sub>, (b) 0.1 M KHCO<sub>3</sub> + 0.1 M KCl, (c) 0.1 M KHCO<sub>3</sub> + 0.1 M KBr, (d) 0.1 M KHCO<sub>3</sub> + 0.1 M KI. EDX mapping of (e) Cu and (f) I element distribution in (d) at -1.7 V vs. RHE.

Table S4. Elemental composition (atomic and weight percentage) as determined by EDX of Cu-plasma electrode after reaction in 0.1 M KHCO<sub>3</sub> + 0.1 M KI electrolyte at -1.7 V vs. RHE.

| Element | Weight (%) | Atomic (%) |
|---------|------------|------------|
| Cu L    | 98.39      | 94.8       |
| I L     | 0.28       | 0.14       |
| O K     | 1.32       | 5.06       |



Table S5. Faradaic efficiencies of products on Cu electrode in KHCO<sub>3</sub> electrolyte at potential range -1.2 V – -1.9 V vs. RHE.

| Potential<br>V vs.<br>RHE | Current<br>density<br>(mA/cm <sup>2</sup> ) | Faradaic efficiency (%) |     |                 |                               |                   |
|---------------------------|---------------------------------------------|-------------------------|-----|-----------------|-------------------------------|-------------------|
|                           |                                             | H <sub>2</sub>          | CO  | CH <sub>4</sub> | C <sub>2</sub> H <sub>4</sub> | HCOO <sup>-</sup> |
| <b>-1.2</b>               | 6.1                                         | 21                      | 1   | 9               | 6                             | 18                |
| <b>-1.4</b>               | 12.2                                        | 24                      | 0.3 | 19              | 9                             | 3                 |
| <b>-1.6</b>               | 13.3                                        | 25                      | 0.7 | 16              | 9                             | 7                 |
| <b>-1.7</b>               | 18.3                                        | 29                      | 0.5 | 17              | 10                            | 9                 |
| <b>-1.9</b>               | 23.9                                        | 31                      | 0.5 | 21              | 13                            | 5                 |

Table S6. Faradaic efficiencies of products on N2-200 electrode in KHCO<sub>3</sub> electrolyte at potential range -1.2 V – -1.9 V vs. RHE.

| Potential<br>V vs.<br>RHE | Current<br>density<br>(mA/cm <sup>2</sup> ) | Faradaic efficiency (%) |     |                 |                               |                   |
|---------------------------|---------------------------------------------|-------------------------|-----|-----------------|-------------------------------|-------------------|
|                           |                                             | H <sub>2</sub>          | CO  | CH <sub>4</sub> | C <sub>2</sub> H <sub>4</sub> | HCOO <sup>-</sup> |
| <b>-1.2</b>               | 9.9                                         | 23                      | 0.8 | 12              | 9                             | 9                 |
| <b>-1.4</b>               | 15.3                                        | 44                      | 0.7 | 18              | 12                            | 9                 |
| <b>-1.6</b>               | 20                                          | 32                      | 0.5 | 17              | 11                            | 4                 |
| <b>-1.7</b>               | 21.1                                        | 36                      | 0.3 | 15              | 9                             | 14                |
| <b>-1.9</b>               | 23.6                                        | 38                      | 0.4 | 14              | 15                            | 4                 |

Table S7. Faradaic efficiencies of products on N2-350 electrode in KHCO<sub>3</sub> electrolyte at potential range -1.2 V – -1.9 V vs. RHE.

| Potential<br>V vs.<br>RHE | Current<br>density<br>(mA/cm <sup>2</sup> ) | Faradaic efficiency (%) |     |                 |                               |                   |
|---------------------------|---------------------------------------------|-------------------------|-----|-----------------|-------------------------------|-------------------|
|                           |                                             | H <sub>2</sub>          | CO  | CH <sub>4</sub> | C <sub>2</sub> H <sub>4</sub> | HCOO <sup>-</sup> |
| <b>-1.2</b>               | 8.7                                         | 27                      | 3.1 | 5               | 9.7                           | 15.1              |
| <b>-1.4</b>               | 13.6                                        | 33                      | 0.8 | 4               | 5.9                           | 9.5               |
| <b>-1.6</b>               | 15.6                                        | 33                      | 0.4 | 9               | 8.3                           | 8.5               |
| <b>-1.7</b>               | 18.3                                        | 35                      | 0.5 | 7               | 20                            | 15                |
| <b>-1.9</b>               | 20.8                                        | 36                      | 0.3 | 11              | 11                            | 4.2               |

Table S8. Faradaic efficiencies of products on N2-500 electrode in KHCO<sub>3</sub> electrolyte at potential range -1.2 V – -1.9 V vs. RHE.

| Potential<br>V vs.<br>RHE | Current<br>density<br>(mA/cm <sup>2</sup> ) | Faradaic efficiency (%) |     |                 |                               |                   |
|---------------------------|---------------------------------------------|-------------------------|-----|-----------------|-------------------------------|-------------------|
|                           |                                             | H <sub>2</sub>          | CO  | CH <sub>4</sub> | C <sub>2</sub> H <sub>4</sub> | HCOO <sup>-</sup> |
| <b>-1.2</b>               | 9.4                                         | 28                      | 1.6 | 1               | 9                             | 21                |
| <b>-1.4</b>               | 12.1                                        | 33                      | 1.6 | 3               | 9                             | 17                |
| <b>-1.6</b>               | 19.8                                        | 37                      | 1.4 | 6               | 20                            | 13                |
| <b>-1.7</b>               | 22.4                                        | 32                      | 0.8 | 2               | 24                            | 16                |
| <b>-1.9</b>               | 21.1                                        | 36                      | 1.9 | 5               | 26                            | 12                |

Table S9. Faradaic efficiencies of products on Cu electrode at -1.7 V vs. RHE in 0.1 M KHCO<sub>3</sub> and 0.1 M KHCO<sub>3</sub> + 0.1 M KX (X = Cl, Br, I) electrolytes.

| Electrolyte                 | Current density<br>(mA/cm <sup>2</sup> ) | Faradaic efficiency (%) |    |                 |                               |                   |                                    |
|-----------------------------|------------------------------------------|-------------------------|----|-----------------|-------------------------------|-------------------|------------------------------------|
|                             |                                          | H <sub>2</sub>          | CO | CH <sub>4</sub> | C <sub>2</sub> H <sub>4</sub> | HCOO <sup>-</sup> | CH <sub>3</sub> CH <sub>2</sub> OH |
| <b>KHCO<sub>3</sub></b>     | 14.3                                     | 28.6                    |    | 16.7            | 10.5                          | 9                 | 2.6                                |
| <b>KHCO<sub>3</sub>+KCl</b> | 19.9                                     | 30.5                    |    | 36.2            | 14.6                          | 2.3               | 7.5                                |
| <b>KHCO<sub>3</sub>+KBr</b> | 31.7                                     | 41                      |    | 30              | 12.9                          | 3.7               | 2.7                                |
| <b>KHCO<sub>3</sub>+KI</b>  | 34.2                                     | 59                      |    | 11.5            | 7.3                           | 7.9               | 0.4                                |

Table S10. Faradaic efficiencies of products on N2-200 electrode at -1.7 V vs. RHE in 0.1 M KHCO<sub>3</sub> and 0.1 M KHCO<sub>3</sub> + 0.1 M KX (X = Cl, Br, I) electrolytes.

| Electrolyte                 | Current density (mA/cm <sup>2</sup> ) | Faradaic efficiency (%) |      |                 |                               |                   |                                    |            |
|-----------------------------|---------------------------------------|-------------------------|------|-----------------|-------------------------------|-------------------|------------------------------------|------------|
|                             |                                       | H <sub>2</sub>          | CO   | CH <sub>4</sub> | C <sub>2</sub> H <sub>4</sub> | HCOO <sup>-</sup> | CH <sub>3</sub> CH <sub>2</sub> OH | n-propanol |
| <b>KHCO<sub>3</sub></b>     | 21.1                                  | 36                      | 0.3  | 14.3            | 5.5                           | 14.8              | N.D.                               | N.D.       |
| <b>KHCO<sub>3</sub>+KCl</b> | 29.8                                  | 26                      | 0.65 | 39.6            | 12.8                          | 7.8               | N.D.                               | N.D.       |
| <b>KHCO<sub>3</sub>+KBr</b> | 29.8                                  | 40.5                    | 0.5  | 26.8            | 9.1                           | 8.1               | N.D.                               | N.D.       |
| <b>KHCO<sub>3</sub>+KI</b>  | 30.7                                  | 54.5                    | 0.45 | 9.5             | 13                            | 19.9              | N.D.                               | N.D.       |

*Notes:* N.D. present the product was not quantified by NMR.

Table S11. Faradaic efficiencies of products on N2-350 electrode at -1.7 V vs. RHE in 0.1 M KHCO<sub>3</sub> and 0.1 M KHCO<sub>3</sub> + 0.1 M KX (X = Cl, Br, I) electrolytes.

| Electrolyte                 | Current density (mA/cm <sup>2</sup> ) | Faradaic efficiency (%) |     |                 |                               |                   |                                    |            |
|-----------------------------|---------------------------------------|-------------------------|-----|-----------------|-------------------------------|-------------------|------------------------------------|------------|
|                             |                                       | H <sub>2</sub>          | CO  | CH <sub>4</sub> | C <sub>2</sub> H <sub>4</sub> | HCOO <sup>-</sup> | CH <sub>3</sub> CH <sub>2</sub> OH | n-propanol |
| <b>KHCO<sub>3</sub></b>     | 18.3                                  | 35                      | 0.5 | 7               | 20                            | 15                | N.D.                               | N.D.       |
| <b>KHCO<sub>3</sub>+KCl</b> | 35.6                                  | 38                      | 0.5 | 21              | 28                            | 7.6               | N.D.                               | N.D.       |
| <b>KHCO<sub>3</sub>+KBr</b> | 35.8                                  | 54.5                    | 0.4 | 7.8             | 12.7                          | 6                 | N.D.                               | N.D.       |
| <b>KHCO<sub>3</sub>+KI</b>  | 41.1                                  | 60                      | 0.3 | 1.7             | 21.5                          | 5.2               | N.D.                               | N.D.       |

**Notes:** N.D. present the product was not quantified by NMR.

Table S12. Faradaic efficiencies of products on N2-500 electrode at -1.7 V vs. RHE in 0.1 M KHCO<sub>3</sub> and 0.1 M KHCO<sub>3</sub> + 0.1 M KX (X = Cl, Br, I) electrolytes.

| Electrolyte                 | Current density (mA/cm <sup>2</sup> ) | Faradaic efficiency (%) |     |                 |                               |                   |                                    |            |
|-----------------------------|---------------------------------------|-------------------------|-----|-----------------|-------------------------------|-------------------|------------------------------------|------------|
|                             |                                       | H <sub>2</sub>          | CO  | CH <sub>4</sub> | C <sub>2</sub> H <sub>4</sub> | HCOO <sup>-</sup> | CH <sub>3</sub> CH <sub>2</sub> OH | n-propanol |
| <b>KHCO<sub>3</sub></b>     | 22.4                                  | 32                      | 0.7 | 1.3             | 24.2                          | 15.6              | 7.3                                | 7.6        |
| <b>KHCO<sub>3</sub>+KCl</b> | 29.9                                  | 38.5                    | 0.8 | 3.4             | 28.1                          | 12                | 8.5                                | 5.5        |
| <b>KHCO<sub>3</sub>+KBr</b> | 32.2                                  | 41                      | 0.9 | 2.1             | 25.7                          | 13                | 6.7                                | 4.1        |
| <b>KHCO<sub>3</sub>+KI</b>  | 33                                    | 40.5                    | 0.5 | 0.1             | 37.2                          | 8.6               | 8.6                                | 1.2        |



Table S13. Faradaic efficiencies of products on Cu-plasma electrode at -1.7 V vs. RHE in 0.1 M KHCO<sub>3</sub> and 0.1 M KHCO<sub>3</sub> + 0.1 M KX (X = Cl, Br, I) electrolytes.

| Electrolyte                 | Current density (mA/cm <sup>2</sup> ) | Faradaic efficiency (%) |     |                 |                               |                   |                                    |            |
|-----------------------------|---------------------------------------|-------------------------|-----|-----------------|-------------------------------|-------------------|------------------------------------|------------|
|                             |                                       | H <sub>2</sub>          | CO  | CH <sub>4</sub> | C <sub>2</sub> H <sub>4</sub> | HCOO <sup>-</sup> | CH <sub>3</sub> CH <sub>2</sub> OH | n-propanol |
| <b>KHCO<sub>3</sub></b>     | 19.9                                  | 27                      | 0.3 | 14.5            | 18.1                          | 7.5               | N.D.                               | N.D.       |
| <b>KHCO<sub>3</sub>+KCl</b> | 32.6                                  | 30                      | 0.2 | 29.5            | 14.1                          | 2.7               | N.D.                               | N.D.       |
| <b>KHCO<sub>3</sub>+KBr</b> | 35.4                                  | 43.2                    | 0.4 | 29              | 7                             | 2.8               | N.D.                               | N.D.       |
| <b>KHCO<sub>3</sub>+KI</b>  | 36.7                                  | 63.3                    | 0.3 | 14.1            | 11.2                          | 6.1               | N.D.                               | N.D.       |

Table S14. Faradaic efficiencies of products on CuAg electrode at -1.7 V vs. RHE in 0.1 M KHCO<sub>3</sub> and 0.1 M KHCO<sub>3</sub> + 0.1 M KX (X = Cl, Br, I) electrolytes.

| Electrolyte                 | Current density (mA/cm <sup>2</sup> ) | Faradaic efficiency (%) |     |                 |                               |                   |                                    |            |
|-----------------------------|---------------------------------------|-------------------------|-----|-----------------|-------------------------------|-------------------|------------------------------------|------------|
|                             |                                       | H <sub>2</sub>          | CO  | CH <sub>4</sub> | C <sub>2</sub> H <sub>4</sub> | HCOO <sup>-</sup> | CH <sub>3</sub> CH <sub>2</sub> OH | n-propanol |
| <b>KHCO<sub>3</sub></b>     | 21.8                                  | 46                      | 0.5 | 1.7             | 26.8                          | 1                 | 7.7                                | 4.9        |
| <b>KHCO<sub>3</sub>+KCl</b> | 41.3                                  | 47                      | 0.5 | 2.1             | 28                            | 1                 | -                                  | -          |
| <b>KHCO<sub>3</sub>+KBr</b> | 40.4                                  | 52.5                    | 0.4 | 2.9             | 29.6                          | 0.75              | 5.6                                | -.         |
| <b>KHCO<sub>3</sub>+KI</b>  | 41.3                                  | 67                      | 0.5 | 0.9             | 20.3                          | 5.65              | 5.2                                | -          |

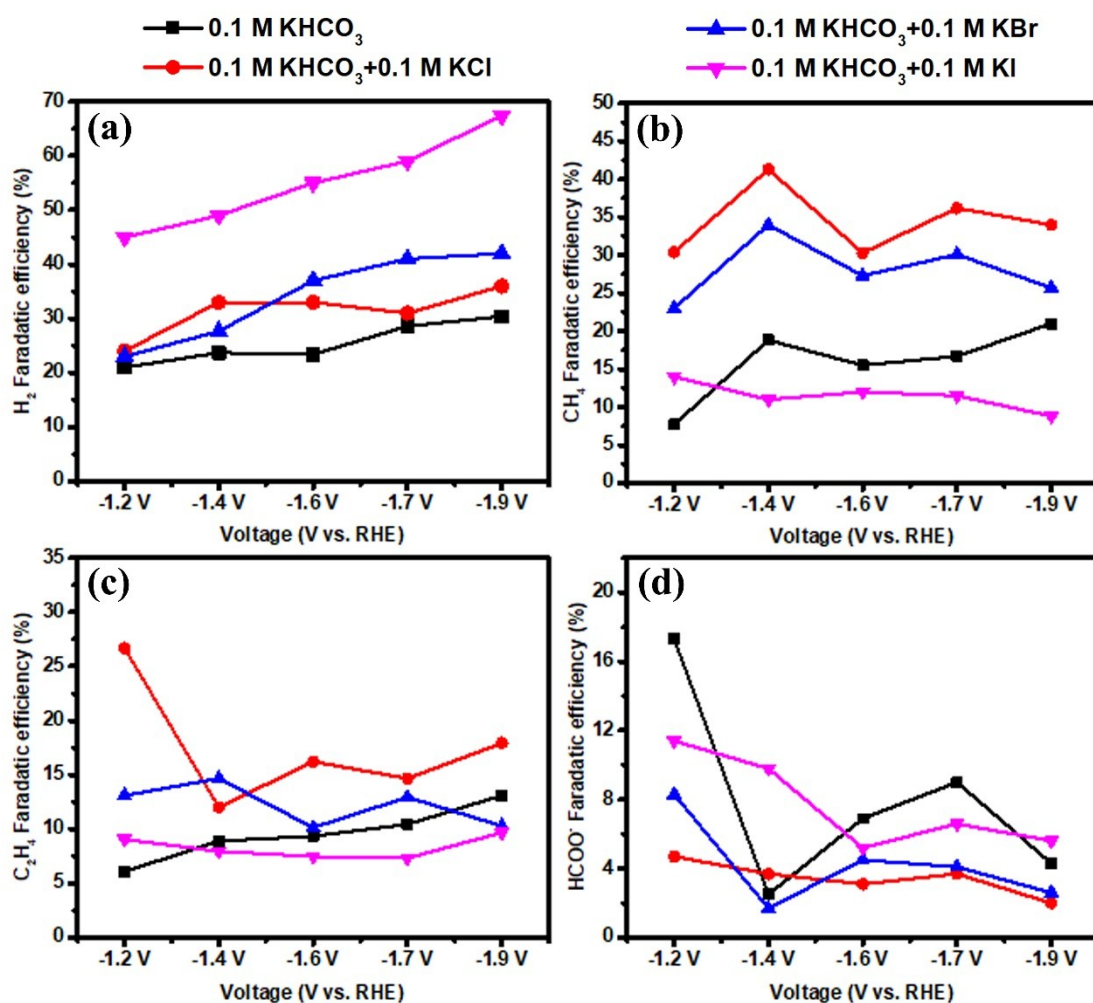

**Fig. S8** Faradaic efficiencies of (a)  $\text{H}_2$ , (b)  $\text{CH}_4$ , (c)  $\text{C}_2\text{H}_4$  and (d)  $\text{HCOO}^-$  on Cu electrode at -1.2 V – -1.9 V vs. RHE in various electrolytes.

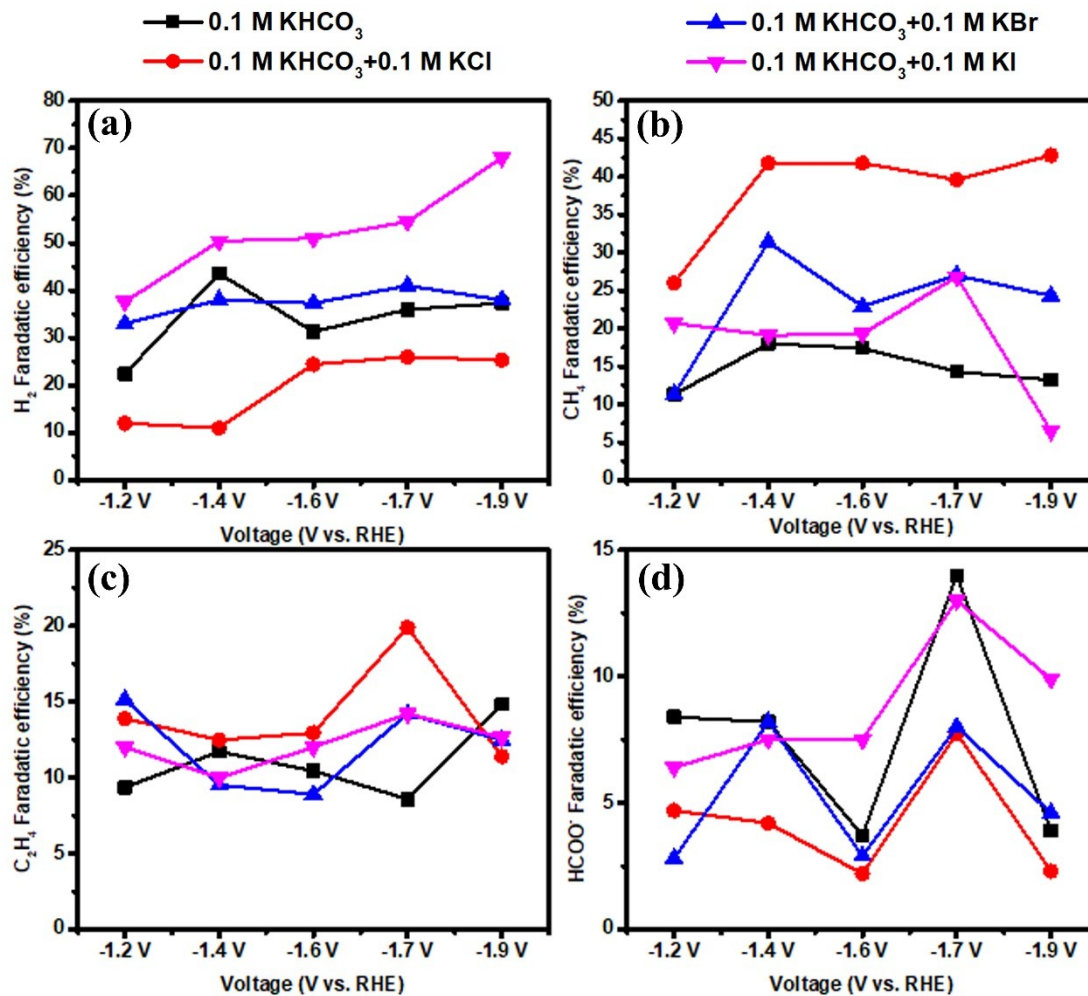

**Fig. S9** Faradaic efficiencies of (a)  $\text{H}_2$ , (b)  $\text{CH}_4$ , (c)  $\text{C}_2\text{H}_4$  and (d)  $\text{HCOO}^-$  on N2-200 electrode at -1.2 V – -1.9 V vs. RHE in various electrolytes.

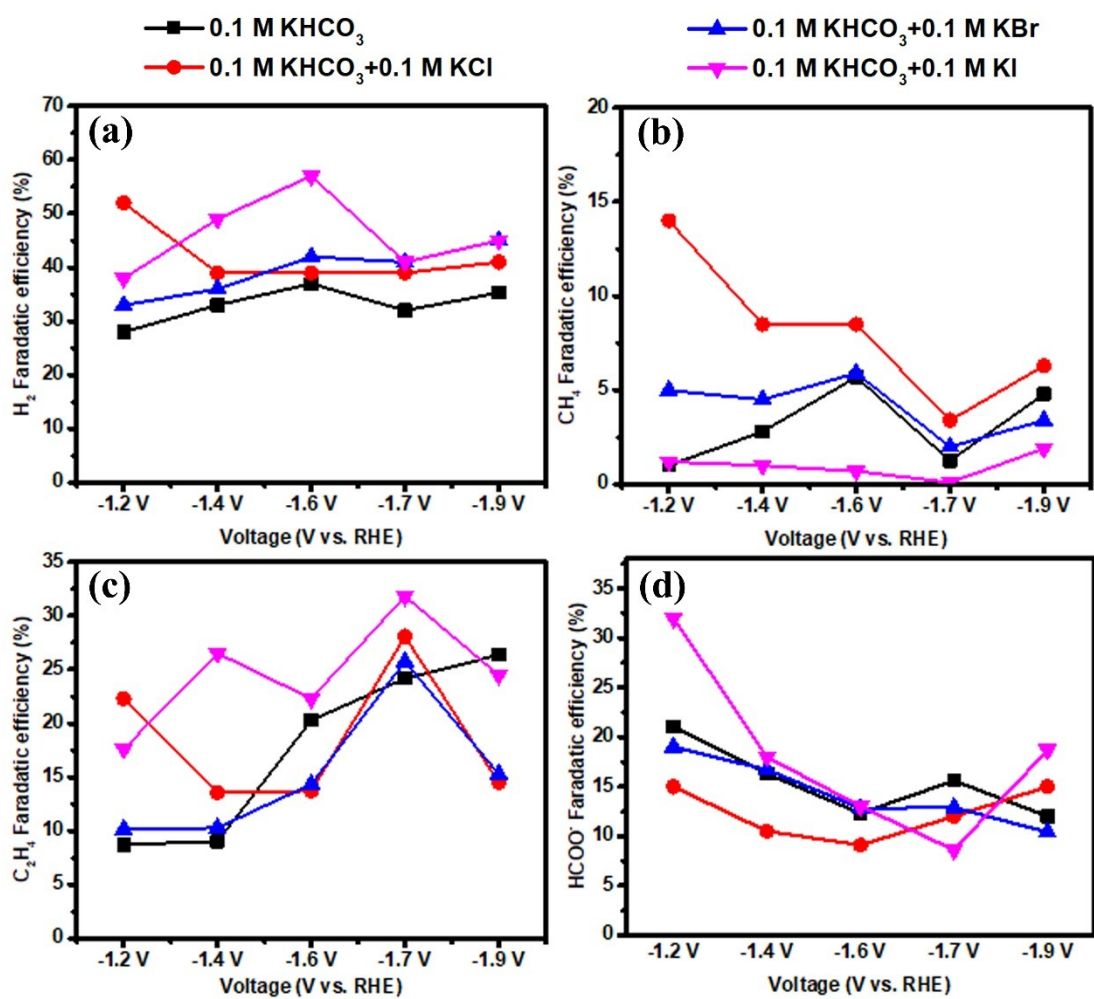

**Fig. S10** Faradaic efficiencies of (a)  $\text{H}_2$ , (b)  $\text{CH}_4$ , (c)  $\text{C}_2\text{H}_4$  and (d)  $\text{HCOO}^-$  on N2-500 electrode at -1.2 V – -1.9 V vs. RHE in various electrolytes.

Table S15. Faradaic efficiency ratio of C<sub>2</sub>H<sub>4</sub>/CH<sub>4</sub> at -1.7 V vs. RHE over Cu-based electrodes in different electrolytes.

| <b>C<sub>2</sub>H<sub>4</sub>/CH<sub>4</sub><br/>Selectivity<br/>-1.7 V vs.<br/>RHE</b> | <b>0.1 M<br/>KHCO<sub>3</sub></b> | <b>0.1 M KHCO<sub>3</sub><br/>+ 0.1 M KCl</b> | <b>0.1 M KHCO<sub>3</sub><br/>+ 0.1 M KBr</b> | <b>0.1 M KHCO<sub>3</sub><br/>+ 0.1 M KI</b> |
|-----------------------------------------------------------------------------------------|-----------------------------------|-----------------------------------------------|-----------------------------------------------|----------------------------------------------|
| Cu                                                                                      | 0.63                              | 0.40                                          | 0.43                                          | 0.64                                         |
| N2-200                                                                                  | 0.60                              | 0.50                                          | 0.53                                          | 0.53                                         |
| N2-350                                                                                  | 2.86                              | 1.33                                          | 1.63                                          | 13.03                                        |
| N2-500                                                                                  | 19.3                              | 8.25                                          | 12.56                                         | 372.06                                       |
| Cu-plasma                                                                               | 1.24                              | 0.47                                          | 0.25                                          | 0.8                                          |
| CuAg                                                                                    | 15.78                             | 13.37                                         | 10.4                                          | 22.53                                        |
